# Supplementary material for: The evolutionary pattern of mutations in glioblastoma reveals therapy-mediated selection
Source: PubMed Central journal article supplement (PMC5814263; doi:10.18632/oncotarget.23541), 2017-12-15
Supplement: oncotarget-09-7844-s001.pdf [file oncotarget-09-7844-s001.pdf]

# The evolutionary pattern of mutations in glioblastoma reveals therapy-mediated selection

## SUPPLEMENTARY MATERIALS

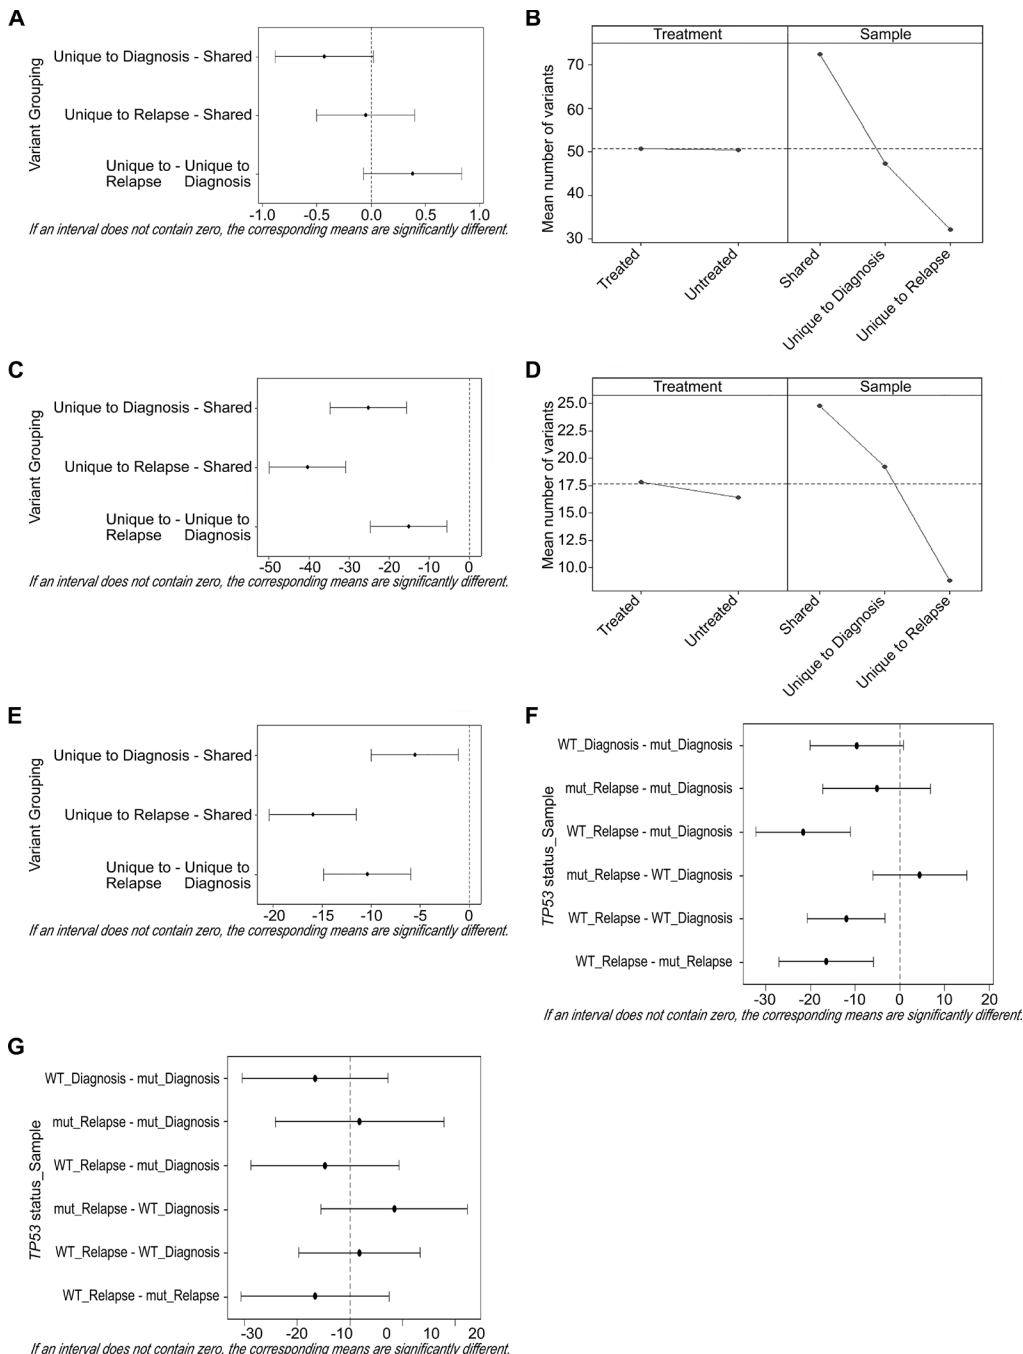

**Supplementary Figure 1:** (A) Tukey significance test of differences observed between the mean number of MMR variants shared or unique to a particular sample. (B) Main effects plot depicting the number of all detected variants. (C) Tukey significance test of differences observed between the mean number of variants shared or unique to a particular sample. (D) Main effects plot depicting non-synonymous and splice site variants and (E) the significance of differences observed between means for this subgroup of variants. Tukey significance testing of the effect of TP53 status on differences between the mean number of (F) low frequency (< 0.4) and G. high frequency ( $\geq 0.4$ ) variants. Comparisons between each possible combination of TP53 status (wildtype WT; mutant mut) and sample type (diagnosis; relapse) are depicted.

**Supplementary Table 1: Summary of the types of variants detected in patient samples.** See\_Supplementary\_Table 1

**Supplementary Table 2: Details of non-synonymous and splice site variants.** See\_Supplementary\_Table 2

**Supplementary Table 3: Proportion and dinucleotide context of TMZ-associated SNVs unique to recurrence**

| Patient | Total number of C > T/G > A variants | % C > T/G > A variants | % CpT & CpC | % CpG | % CpA |
|---------|--------------------------------------|------------------------|-------------|-------|-------|
| 28      | 2                                    | 11                     | 50          | 0     | 50    |
| 29      | 0                                    | 0                      | 0           | 0     | 0     |
| 1       | 1                                    | 8                      | 100         | 0     | 0     |
| 2       | 0                                    | 0                      | 0           | 0     | 0     |
| 3       | 1                                    | 6                      | 100         | 0     | 0     |
| 4       | 10                                   | 27                     | 20          | 50    | 30    |
| 7       | 0                                    | 0                      | 0           | 0     | 0     |
| 8       | 0                                    | 0                      | 0           | 0     | 0     |
| 9       | 0                                    | 0                      | 0           | 0     | 0     |
| 10      | 1                                    | 7                      | 0           | 0     | 100   |
| 11      | 3                                    | 18                     | 67          | 33    | 0     |
| 12      | 3                                    | 23                     | 33          | 67    | 0     |
| 14      | 3                                    | 23                     | 33          | 0     | 67    |
| 15      | 0                                    | 0                      | 0           | 0     | 0     |
| 16      | 12                                   | 39                     | 25          | 50    | 25    |
| 18      | 0                                    | 0                      | 0           | 0     | 0     |
| 19      | 2                                    | 10                     | 50          | 50    | 0     |
| 20      | 1                                    | 7                      | 100         | 0     | 0     |
| 21      | 48                                   | 72                     | 73          | 19    | 8     |
| 22      | 1                                    | 10                     | 100         | 0     | 0     |
| 26      | 0                                    | 0                      | 0           | 0     | 0     |

**Supplementary Table 4: Tumor purity estimates and assessment of neutral evolution model fit.** See\_Supplementary\_Table 4

**Supplementary Table 5: Primer sequences**

|                    | <b>Forward primer</b>        | <b>Reverse primer</b>      |
|--------------------|------------------------------|----------------------------|
| <i>EGFR_ex13</i>   | TGCTCTGTCACTGACTGCTG         | CCAAAACCTCCAAAAGCCAAGG     |
| <i>EGFR_ex15</i>   | TTTGGCTTTCCCACTCACA          | CTGTGGGGACCAAAACACCT       |
| <i>EGFR_ex28</i>   | GGACAACCCTGACTACCAGC         | TGCAAAACCAGTCTGTGGGT       |
| <i>ERBB2_ex11</i>  | GACTGCCTGGTATGTGCCTC         | CAAAGCAAGATGCAGACAGTGC     |
| <i>FANCD2_ex9</i>  | CTGGGTAATGTGGCTGCAGTTCTA     | TGCATACTGCAGTGATAGAACCC    |
| <i>IDH1_ex8</i>    | GGTCATTTGGTTGTGGTGGG         | CTGCTAAACCTCAGTTTTGCC      |
| <i>NF1_ex17</i>    | CCTCTTGGTTGTCAGTGCTTC        | CTGTACCTTTGTTAGCCGGTACG    |
| <i>NF1_ex18</i>    | ATGTCTTCCACCCTTGACTCTC       | GATGCCATGTGCTTTGAGGC       |
| <i>NF1_ex44</i>    | ACTTGCATGGACTGTGTTATTGG      | AGCTCTTGGTTGCAGGGATG       |
| <i>NF1_ex46</i>    | GCTAGCTACCAAGATCACCATAGC     | CAAGCGCTTGAGAACATACTATCC   |
| <i>NF1_ex50</i>    | AGGAGACTGTAAGAAGTTCATCCTG    | CTGCTTGCCTCCATTAGTTGG      |
| <i>PTEN_ex1</i>    | CGCCACCAGCAGCTTCTG           | CCAAACTACGGACATTTTCGCATCC  |
| <i>PTEN_ex6</i>    | ATGGCTACGACCCAGTTACC         | GCTTCTTTAGCCCAATGAGTTGAAC  |
| <i>PTEN_ex7</i>    | GTTTGACAGTTAAAGGCATTTCTGTG   | TGCCAGAGTAAGCAAAACACCTG    |
| <i>ERCC4_ex8</i>   | GGCACAGGGAAACTAGGAGG         | AACCCAGAAGCGGATGGATG       |
| <i>FANCA_ex4</i>   | TGCCACCAGTTTTATTGTGAGC       | GTAACAACGGGCAGGTTTCC       |
| <i>FANCA_ex27</i>  | ATGCTCAGGCCATCCAGTTC         | GTCCGAAAGCTGCGTAAACC       |
| <i>FANCA_ex33</i>  | CCTTGGGAAGGAGCAGAGTG         | GCTGGTTTGGTGATGTGCTG       |
| <i>FANCA_ex35</i>  | GTTGGTCTCGCCTCTCTTCC         | CCCTGAGATGGTAACACCCG       |
| <i>FANCD2_ex25</i> | AGCAAGGACAGCTAGCTCCAG        | CAGCTAGAGAAGCACACGGG       |
| <i>FANCG_ex10</i>  | GGTGAAGAGGTTGGGGATGG         | GAGCTCACCAACTCAGGTCC       |
| <i>MLH1_ex2</i>    | GAAATGATGGTTGCTCTGCC         | GACTCTTCCATGAAGCGCAC       |
| <i>MSH2_ex3</i>    | AGGCTTCTCCTGGCAATCTC         | TCCTAGGCCTGGAATCTCCTC      |
| <i>MSH2_ex6</i>    | GGGAGAAATGTACAGTTGAACATACGG  | GTGGTATAATCATGTGGGTAAC TGC |
| <i>MSH2_ex11</i>   | GGATAATGTTTCACGTAGTACACATTGC | ACCAAAAGCCAGGTGACATTC      |
| <i>MSH2_ex12</i>   | CTGTTGTCAGCTTTGCTCAG         | ACGTTACCCCCACAAAGCC        |
| <i>MSH6_ex4</i>    | TGGGTCTCCCCTGAAGAGTC         | AAGGCTGTATCCCATCGGTTTCC    |
| <i>PARP1_ex4</i>   | TATCCTTGCTTGTGCTCCC          | GAACCTGTAGGGCCTTTGGG       |
| <i>PARP1_ex8</i>   | GGTGGTTACCTCAAGGGAGAG        | TCCACACCACCAGCAAGTAG       |
| <i>PMS2_ex11</i>   | ATGCTGTCTTCTAGCACTTCAGGTG    | TCCCCTTCACTTTGCTGTGC       |
| <i>PRKDC_ex11</i>  | GAGACTAAGCAAATGGAAGCAAAGG    | CGCCCATGTTATTCAAGGGTCTAC   |
| <i>PRKDC_ex19</i>  | TGTTCTGACTAGCCTGTGCCTTG      | GATTAAGGGCATGAGCCACCG      |
| <i>PRKDC_ex65</i>  | GCTTCTTTTTCTCTCTCCTTTCCG     | CCCTAGTGCTTCAAGTACTACCTG   |
| <i>PRKDC_ex83</i>  | TTAGTGGGATCACAGCAGCC         | ATGATGACTCTCGCCTTGCC       |
| <i>PRKDC_ex84</i>  | GGATGCTGCCATTTGTGCTC         | GCTTGATCACGGGACACTG        |
| <i>XPC_ex2</i>     | TTATGCCCTGCCATAAGC           | CTTCCATGGACCCCAGTGAC       |
| <i>XPC_ex9</i>     | GCAGCGGCTCTGATTTTGAG         | TCGCTGCACATTTTCTTGCC       |
| <i>XRCC2_ex3</i>   | TGGATAGACCGCGTCAATGG         | TCCACATCACACAGTCGTGC       |
| <i>CCND1_ex5</i>   | CTGCCAGGAGCAGATCGAAG         | GGAGAGGAGGGACTGTCAGG       |
| <i>CDKN2A_ex3</i>  | GCTTCCTTTCCGTCATGCCG         | CGTGAGCTGAGGCAAGACC        |
| <i>IDH1_ex9</i>    | CGGTCTTCTGTTTGGGACAAGC       | CCCTGGAATGACCCTGTTCC       |
| <i>RB1_ex23</i>    | GCTTCCACCAGGGTAGGTC          | AGATTTTCTTACCCCCGCC        |
| <i>RB1_ex20</i>    | CTCTGGGGGAAAGAAAAGAGTGG      | GTAAGTAGGGAGGAGAGAAGGTGAAG |
